# Supplementary material for: Longer-term recurrence rate after low versus high dose radioiodine ablation for differentiated thyroid Cancer in low and intermediate risk patients: a meta-analysis
Source: Springer Nature journal article supplement (doi:10.1186/s12885-020-07029-3), 2020-06-15

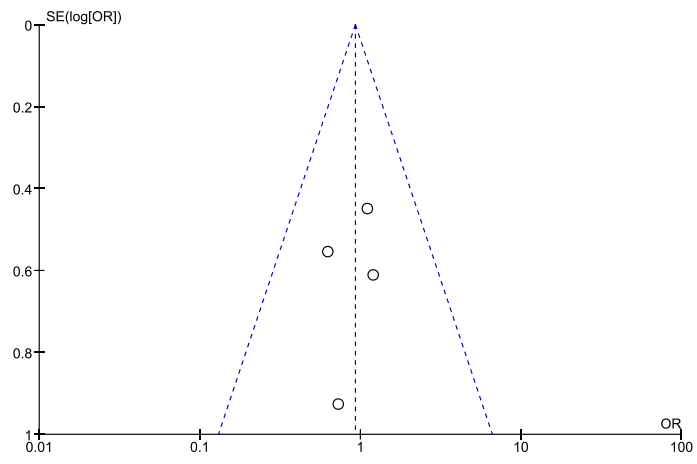

Supplement: MOESM2 [file 18084364]
